# Supplementary material
Source: PubMed Central journal article supplement (PMC3911593)
Supplement: JVI.02578-13_zjv999098594so1.pdf [file JVI.02578-13_zjv999098594so1.pdf]

| <u>PROTEIN IDENTITY</u>                                                 | <u>PEPTIDES RECOVERED</u> |
|-------------------------------------------------------------------------|---------------------------|
| Isoform 1 of Transcription Intermediary factor 1-beta                   | 33                        |
| 60S ribosomal protein L4                                                | 5                         |
| Elongation factor 1-alpha                                               | 3                         |
| Probable ATP-dependent RNA helicase DDX5                                | 3                         |
| Proliferation-associated protein 2G4 (EBP1)                             | 3                         |
| TUBA1C protein                                                          | 2                         |
| Probable ATP-dependent RNA helicase DDX41                               | 1                         |
| 60S ribosomal protein L8                                                | 1                         |
| Heat shock protein 75 kDa, mitochondrial precursor                      | 1                         |
| 60S ribosomal protein L18                                               | 1                         |
| similar to ribosomal protein L7a                                        | 1                         |
| 60S ribosomal protein L3                                                | 1                         |
| Poly(rC)-binding protein 1                                              | 1                         |
| cDNA FLJ78679, highly similar to Homo sapiens DEAD box pol              | 1                         |
| similar to protein expressed in prostate, ovary, testis, and placenta 2 | 1                         |
| Beta-defensin 112 precursor                                             | 1                         |
| 60S ribosomal protein L10a                                              | 1                         |

## **SUPPLEMENTARY TABLE 1**

List of cellular proteins recovered in Flag-ZFP809 immunoprecipitates as identified by mass spectrometry.
